# Supplementary material for: Restriction Endonucleases that Bridge and Excise Two Recognition Sites from DNA
Source: PubMed Central journal article supplement (PMC1892151; doi:10.1016/j.jmb.2006.12.070), 2007-03-23
Supplement: mmc1.pdf [file mmc1.pdf]

Submission to Journal of Molecular Biology.

Supplementary Data for -

Restriction Endonucleases that Bridge Two  
Recognition Sites and Cleave Eight Phosphodiester  
Bonds

Jacqueline J. T. Marshall, Darren M. Gowers, and  
Stephen E. Halford \*

*The DNA-Protein Interactions Unit, Department of  
Biochemistry, School of Medical Sciences, University  
of Bristol, University Walk, Bristol BS8 1TD, UK*

\* Corresponding author:

Phone: +44-(0)117-928-7429

FAX: +44-(0)117-928-8274

E-mail: s.halford@bristol.ac.uk

## Supplementary Figure S1

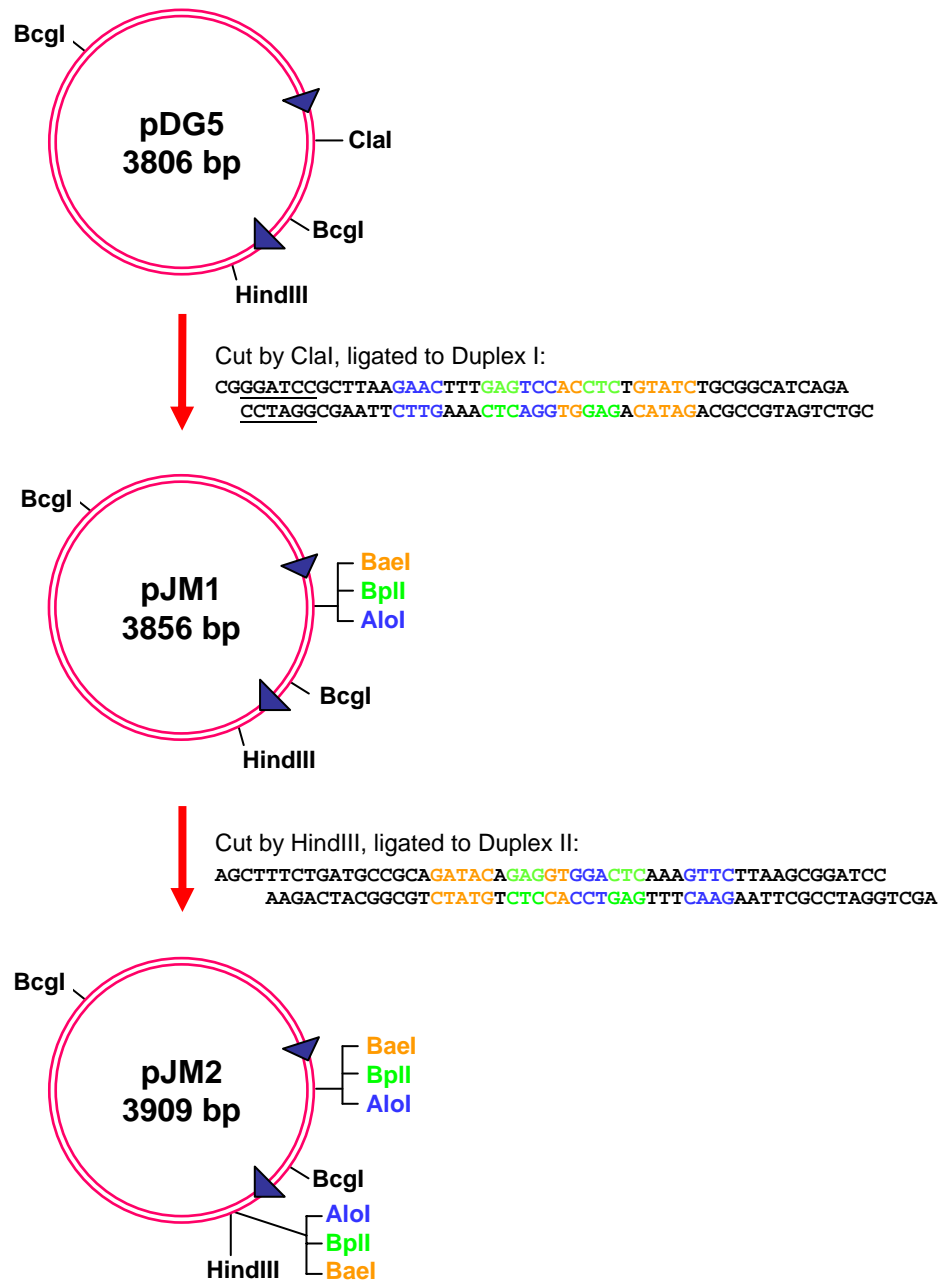

### Construction of plasmids containing one or two *AloI*, *BaeI* and *BpII* recognition sites

The plasmid pDG5 was cleaved at its single *ClaI* site and the linear product ligated to Duplex I, which contains recognition sequences for *AloI*, *BaeI* and *BpII* (marked in blue, orange and green, respectively) and for *BamHI* (underlined). The ligation yielded the plasmid pJM1, which in turn was cleaved at its single *HindIII* site and ligated to Duplex II. Duplex II has the same 5'–3' sequence as Duplex I and so also carries recognition sites for *AloI*, *BaeI* and *BpII* (coloured as above) within the same sequence context as Duplex I. The ligation yielded, among others, the plasmid pJM2, that had two sites for *AloI*, for *BaeI* and for *BpII*, in the orientation shown. All of the plasmids shown also carry two *res* sites from *Tn21* in repeated orientation (noted as blue arrowheads): in the catenane derived from pJM2, each ring has one site for *AloI*, for *BaeI* and for *BpII*.

## Supplementary Figure S2

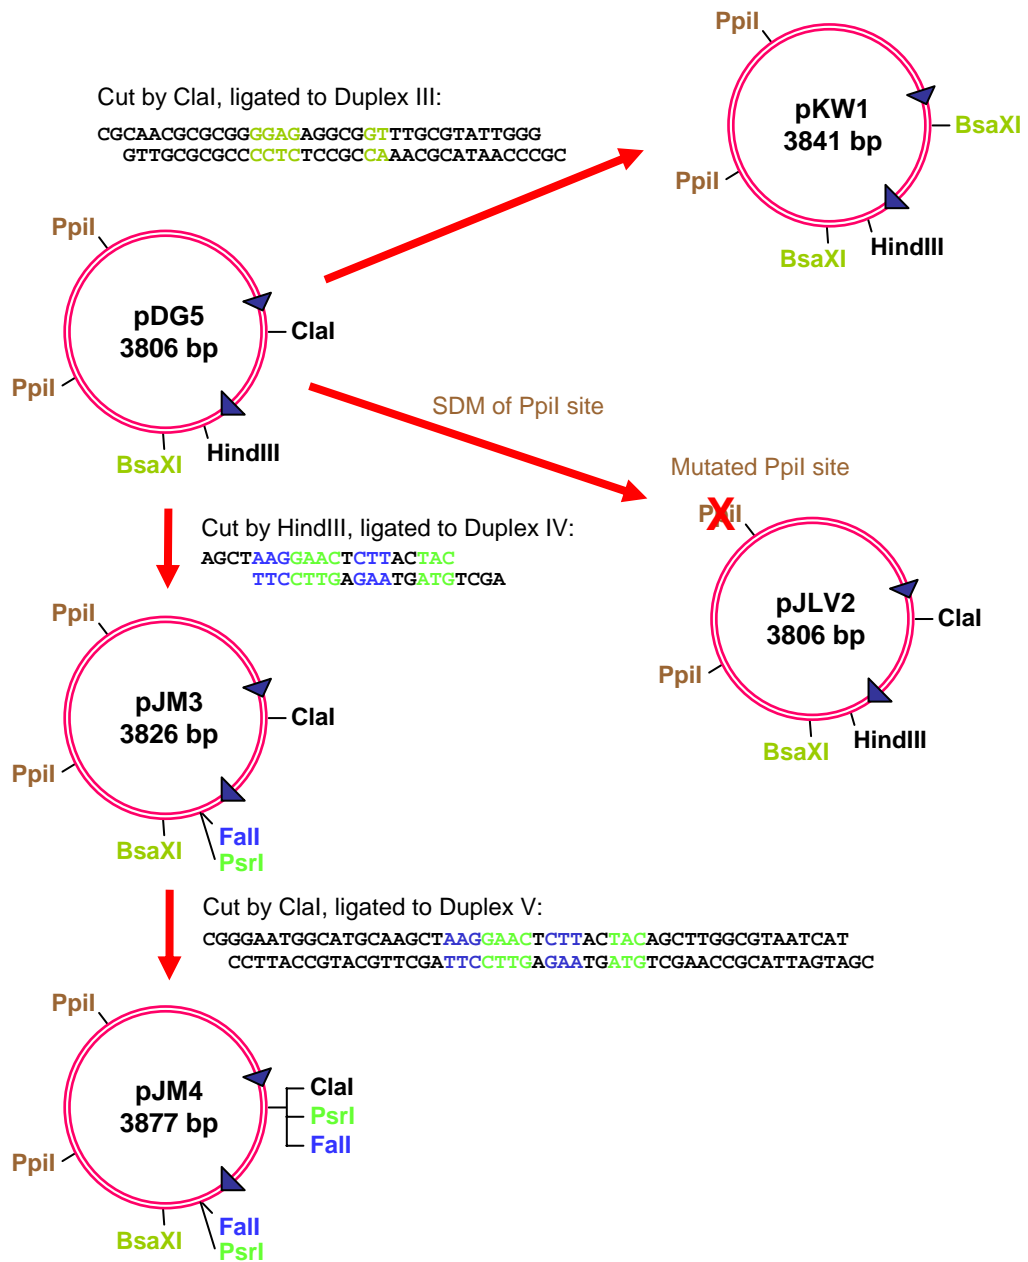

### Construction of plasmids containing one or two Ppil, BsaXI, Fall and PstI recognition sites

The plasmid pDG5 was cleaved at its ClaI site and the linear product ligated to Duplex III, which carries the recognition sequence for BsaXI (in olive), to give the plasmid, pKW1, with two recognition sites for BsaXI in inverted orientation. The initial plasmid pDG5 has two (inverted) Ppil sites: a plasmid with a single Ppil site, pJLV2, was constructed by using site-directed mutagenesis (Stratagene QuikChange) to make two single-base changes, one in each part of the bipartite recognition sequence, in one of the Ppil sites of pDG5 (as indicated by the red cross). Plasmids with one and with two (inversely-oriented) recognition sites for Fall and PstI were also constructed from pDG5: by first cutting pDG5 with HindIII and ligating it to Duplex IV, to give pJM3; then by cutting pJM3 with ClaI and ligating it to Duplex V, to give pJM4. Duplexes IV and V both contain recognition sites for Fall and PstI (in blue and green respectively): the sequences around these sites in Duplex V are the same as those in pJM3. All of the plasmids shown also carry two res sites from Tn21 in directly repeated orientation (noted as blue arrowheads).

## Supplementary Figure S3

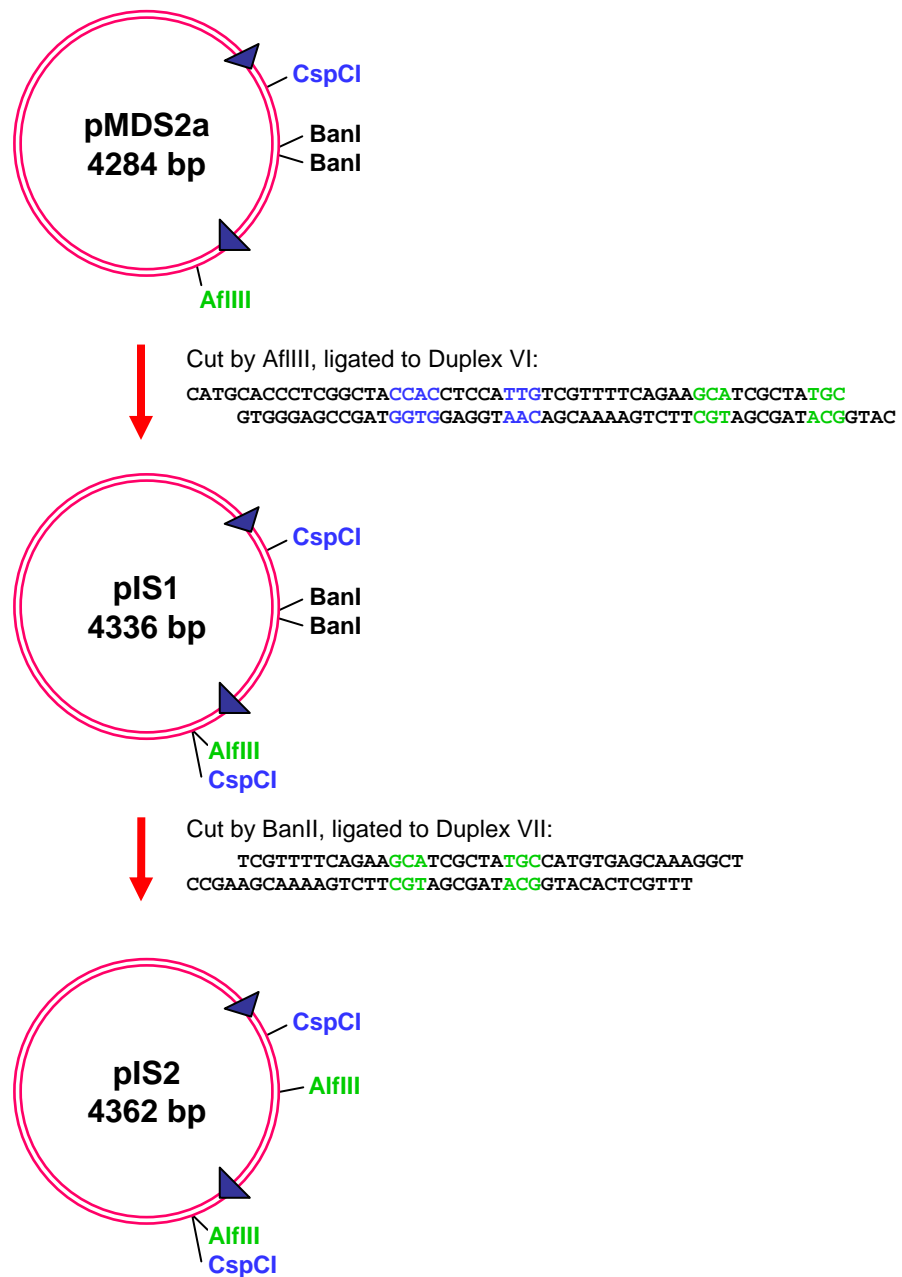

### Construction of plasmids containing one or two CspCI and Alfl recognition sites

The plasmid pMDS2a was cleaved at its single AfII site and the linear product ligated to Duplex VI, which contains recognition sequences for CspCI and Alfl (marked in blue and green, respectively): the CspCI site in the duplex is in the same sequence context as the native site in pMDS2a. The ligation yielded the plasmid pIS1, which has two CspCI sites in inverted orientation and one Alfl site. It in turn was cleaved with BanII and ligated to Duplex VII. Duplex VII carries the recognition sequence for Alfl (in green), within the same sequence context as the Alfl site in pIS1. The ligation yielded, among others, the plasmid pIS2, that has two inversely oriented Alfl sites. All of the plasmids shown also carry two *res* sites from Tn21 in repeated orientation (noted as blue arrowheads): in the catenanes derived from pIS1 and pIS2, each ring carries one CspCI site.
